# Supplementary material for: Inhibition of Japanese encephalitis virus infection by the host zinc-finger antiviral protein
Source: PLoS Pathog. 2018 Jul 17;14(7):e1007166. doi: 10.1371/journal.ppat.1007166 (PMC6049953; doi:10.1371/journal.ppat.1007166)
Supplement: S2 Table — (XLSX) [file ppat.1007166.s012.xlsx]

## Sheet: S2 Table
	S2 Table. Primer sets for amplification of DNA templates for in vitro transcription
	PCR product	Primer name	Sequence (5' to 3')	Note
	SP6-JR2A NS5mt replicon	SP6-JEV 5'-UTR	ATTTAGGTGACACTATAGAGAAGTTTATCTGTGTGAACTTCTTG	Fig. 4F, 4G
		JEV 3'-UTR (10977-10956)	AGATCCTGTGTTCTTCCTCACC
	Firefly luciferase (Fluc)	SP6-Fluc-F (NcoI)	ATTTAGGTGACACTATAGCCATGGAAGACGCCAAAAACATA	Fig. 4F, 4G, 7B, 8C
		Fluc-R (XbaI)	TCTAGAATTACACGGCGATCTTTC
	Renilla luciferase (Rluc)	SP6-Rluc-F	ATTTAGGTGACACTATAGATGACTTCGAAAGTTTATGATCCAG	Fig. 7B, 8C
		Rluc-R	TTATTGTTCATTTTTGAGAACTCGCTC
	Fluc/5'-UTR197	SP6-JEV 5'-UTR	ATTTAGGTGACACTATAGAGAAGTTTATCTGTGTGAACTTCTTG	Fig. 7B
		Fluc-R (XbaI)	TCTAGAATTACACGGCGATCTTTC
	Fluc/3'-UTR	SP6-Fluc-F (NcoI)	ATTTAGGTGACACTATAGCCATGGAAGACGCCAAAAACATA	Fig. 7B
		JEV 3'-UTR (SpeI 10977-10956)	CCACTAGTAGATCCTGTGTTCTTCCTCACC
	Fluc/5'+3'-UTR	SP6-JEV 5'-UTR	ATTTAGGTGACACTATAGAGAAGTTTATCTGTGTGAACTTCTTG	Fig. 7B, 8C
		JEV 3'-UTR (SpeI 10977-10956)	CCACTAGTAGATCCTGTGTTCTTCCTCACC
	Fluc/5'+3'-UTR/Domain I+II	SP6-JEV 5'UTR	ATTTAGGTGACACTATAGAGAAGTTTATCTGTGTGAACTTCTTG	Fig. 8C
		JEV 3'UTR (10860-10835)	GATGCAAATGCGGGGTCTCCTCTAA
	Fluc/5'+3'-UTR/Domain II+III	SP6-JEV 5'UTR	ATTTAGGTGACACTATAGAGAAGTTTATCTGTGTGAACTTCTTG	Fig. 8C
		JEV 3'-UTR (SpeI 10977-10956)	CCACTAGTAGATCCTGTGTTCTTCCTCACC
	Fluc/5'+3'-UTR/Domain I	SP6-JEV 5'UTR	ATTTAGGTGACACTATAGAGAAGTTTATCTGTGTGAACTTCTTG	Fig. 8C
		JEV 3'-UTR (10536-10507)	TTA ACC CAG TCC TCC TGG GAC TGA GAC GCA
	Fluc/5'+3'-UTR/Domain II	SP6-JEV 5'UTR	ATTTAGGTGACACTATAGAGAAGTTTATCTGTGTGAACTTCTTG	Fig. 8C
		JEV 3'-UTR (10860-10835)	GATGCAAATGCGGGGTCTCCTCTAA
	Fluc/5'+3'-UTR/Domain III	SP6-JEV 5'UTR	ATTTAGGTGACACTATAGAGAAGTTTATCTGTGTGAACTTCTTG	Fig. 8C
		JEV 3'-UTR (SpeI 10977-10956)	CCACTAGTAGATCCTGTGTTCTTCCTCACC
	J5'-UTR197	SP6-JEV 5'-UTR	ATTTAGGTGACACTATAGAGAAGTTTATCTGTGTGAACTTCTTG	Fig. S10
		JEV core (NcoI 197-174)	TATCCATGGTACTACCCTCTTCACTCCCACTAG
	J3'-UTR/Full length	SP6-JEV 3'-UTR (10392-10417)	ATTTAGGTGACACTATAGTAGTGTGATTTAAGGTAGAAAAGTAG	Fig. 7C, 8B, S10
		JEV 3'-UTR (SpeI 10977-10956)	CCACTAGTAGATCCTGTGTTCTTCCTCACC
	J3'-UTR/Domain I	SP6-JEV 3'-UTR (10392-10417)	ATTTAGGTGACACTATAGTAGTGTGATTTAAGGTAGAAAAGTAG	Fig. 8B
		JEV 3'-UTR (10536-10507)	TTA ACC CAG TCC TCC TGG GAC TGA GAC GCA
	J3'-UTR/Domain II	SP6-JEV 3'-UTR (10537-10563)	ATTTAGGTGACACTATAGCAAATCTGACAATAGAAAGTGAGAAAG	Fig. 8B
		JEV 3'-UTR (10860-10835)	GATGCAAATGCGGGGTCTCCTCTAA
	J3'-UTR/Domain III	SP6-JEV 3'-UTR (10861-10884)	ATTTAGGTGACACTATAGAAACAGCATATTGACACCTGGGAA	Fig. 8B
		JEV 3'-UTR (SpeI 10977-10956)	CCACTAGTAGATCCTGTGTTCTTCCTCACC
	J3'-UTR/Domain I+II	SP6-JEV 3'-UTR (10392-10417)	ATTTAGGTGACACTATAGTAGTGTGATTTAAGGTAGAAAAGTAG	Fig. 8B
		JEV 3'-UTR (10860-10835)	GATGCAAATGCGGGGTCTCCTCTAA
	* The SP6 promoter sequence was underlines.
